# Supplementary material for: βArrestin2 Mediates Renal Cell Carcinoma Tumor Growth
Source: PubMed Central journal article supplement (PMC5861056; doi:10.1038/s41598-018-23212-w), 2018-03-20

Supplemental Information

## **$\beta$ Arrestin2 Mediates Renal Cell Carcinoma Tumor Growth**

Jude Masannat<sup>‡</sup>, Hamsa Thayele Purayil, Yushan Zhang<sup>†</sup>, Michelle Russin, Iqbal Mahmud, Wanju Kim, Daiqing Liao, Yehia Daaka<sup>§</sup>

Department of Anatomy and Cell Biology, University of Florida College of Medicine, Gainesville, FL 32610

<sup>§</sup>Correspondence: Yehia Daaka, 1333 Center Drive, B1-004, Gainesville, FL, 32610. Phone: 352-273-8112; Fax: 352-846-1248; E-mail: [ydaaka@ufl.edu](mailto:ydaaka@ufl.edu)

## Supplementary Figure Legends

**Figure S1. ARRB2 expression profile in human RCC.** ARRB2 transcript levels from four Gene Expression Omnibus (GEO) datasets of **A**, GSE11151; **B**, GSE15641; **C**, GSE14994; and **D**, GSE6344 were queried for the association with disease status. P values were calculated by using two-tailed Student's t test. Box and whisker plot line (from top to bottom): maximum; Q3, third quartile; median; Q1, first quartile; and minimum.

**Figure S2.  $\beta$ Arr2 mediates RCC cell migration and invasion.** **A**, Forced expression of  $\beta$ Arr2 in CAKI-1 cells. Cells were transfected with empty vector pcDNA (EV) or pcDNA-Flag- $\beta$ Arr2 (Flag- $\beta$ Arr2) plasmids. Western blots show expression of  $\beta$ Arr2. HSP90 expression served as a protein loading control. **B**, Knockdown of  $\beta$ Arr2 in ACHN cells. Cells were transfected with si $\beta$ Arr2 (50 nM) and control (siCon) and  $\beta$ Arr2 protein levels were measured by Western blot. **C**, Migration assay. Migration assay using control and  $\beta$ Arr2 knockdown ACHN cells were performed for 8 hr using transwell inserts. Images shown are representative of three independent trials. **D**, Migrated cells in five randomly-selected 100x fields were counted and plotted relative to control cells. **E**, Invasion assay. Control and  $\beta$ Arr2 knockdown SN12C ( $1.0 \times 10^5$ ) cells were allowed to migrate through matrigel-coated transwell inserts for 24 hr and then invaded cells were quantified. Data shown are mean  $\pm$  SD for three trials,  $**P < 0.001$ ,  $***P < 0.0001$ .

**Figure S3. RCC localized and metastatic tumor growth are controlled by  $\beta$ Arr2.** **A**, Representative ultrasound images of mice kidneys after tumor implantation. Tumor growth images are from the same mouse tracked over time. Orange circle shows the tumor and the circle size reflects potential tumor area. An image of the normal contralateral kidney is also shown for the same mouse. **B**, A representation of the overall visible metastasis status at experiment termination for control and  $\beta$ Arr2<sup>ko</sup> cells implanted mice. Arrows indicate metastatic growth. **C**, Renal lymph nodes from control and  $\beta$ Arr2<sup>ko</sup> Clone1 and Clone2 were harvested

from mice (n=7 mice per cell line) and pictured. N, contralateral normal kidney and T, kidney harboring tumor. **D**, Tumor weight was measured by subtracting the weight of N lymph node from that of T lymph node. \*\*, P < 0.01. **E**, Representative anti-human LDHA staining of lymph node tissue sections showing the infiltration to tumor-side and contralateral-side lymph node of control, but not  $\beta$ Arr2<sup>ko</sup> Clone1 or Clone2 harboring animals.

**Figure S4. RCC tumor growth is controlled by  $\beta$ Arr2.** **A**, Subrenal tumor growth. Control and  $\beta$ Arr2<sup>ko</sup> cells were embedded in collagen and implanted under the renal capsule of Hsd: athymic nude mice and allowed to grow for 9 weeks (N-contralateral normal kidney, T-kidney with tumor). **B**, Scatter-plot showing the tumor weights of 5 week-long and 9 week-long subrenal tumor growth calculated by subtracting the weight of normal kidney (N) from tumor kidney (T).

**Figure S5.  $\beta$ Arr2 regulates cell cycle progression.** **A**, Proliferation assay. Representative IHC images of anti-human Ki67 staining and consecutive anti-human LDHA staining of the same tumor area are shown. **B**, Cell cycle analysis. Control and  $\beta$ Arr2<sup>ko</sup> ( $5 \times 10^4$ ) cells were counted in the LSRII flow machine and plotted against FSC. Blue bar represents gating for viable cells and the percentage of cells counted in the gate is indicated above the bar.

**A** Yusenko *et al.* BMC Cancer 2009

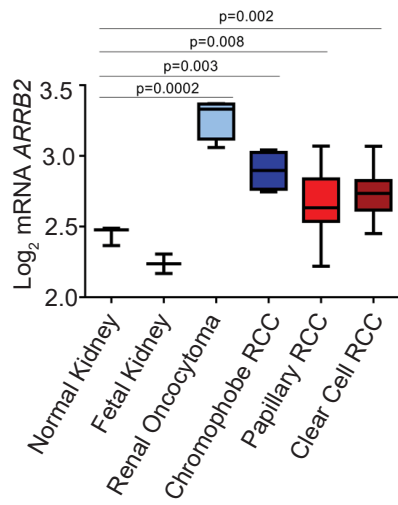

**B** Jones *et al.* Clin Can Res 2005

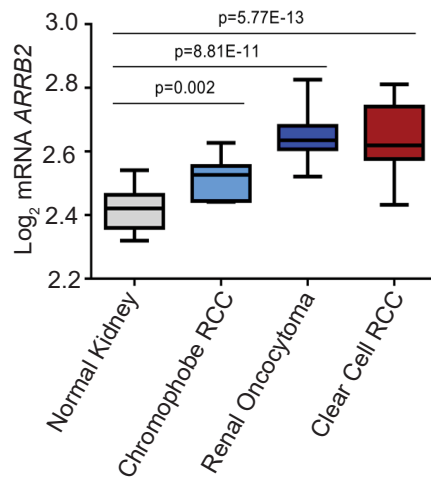

**C** Beroukhim *et al.* Cancer Res 2009

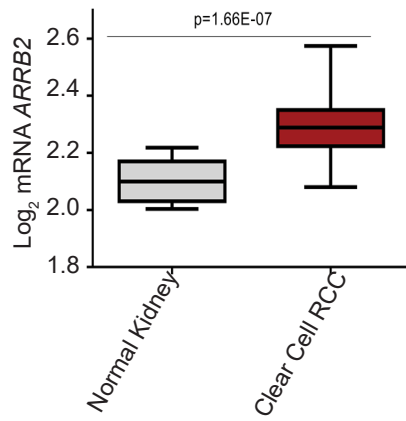

**D** Gumz *et al.* Clin Can Res 2007

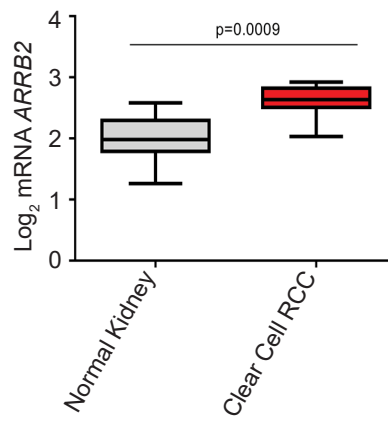

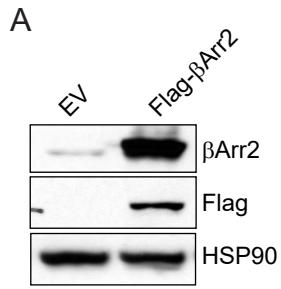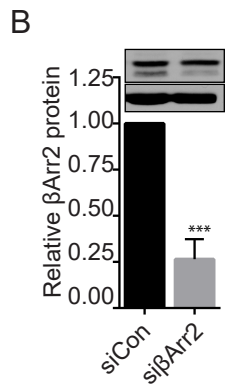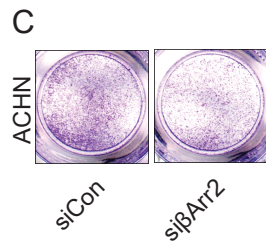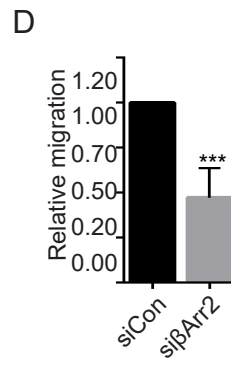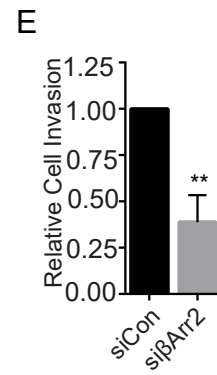

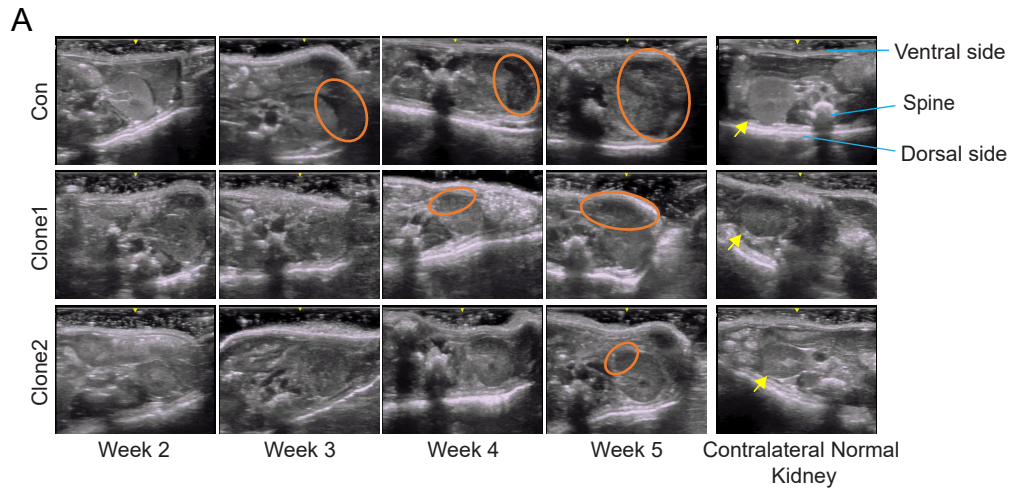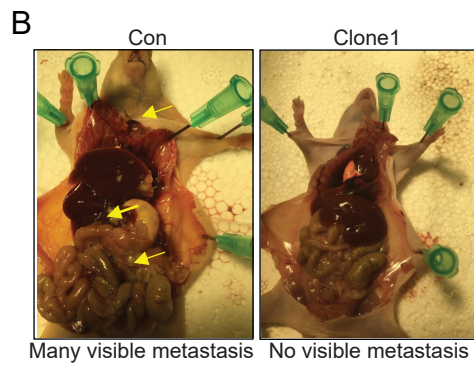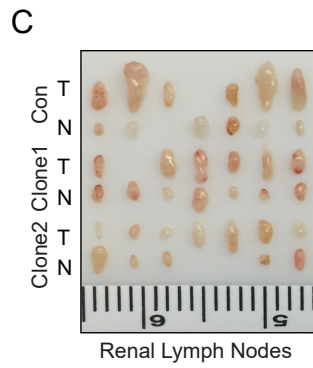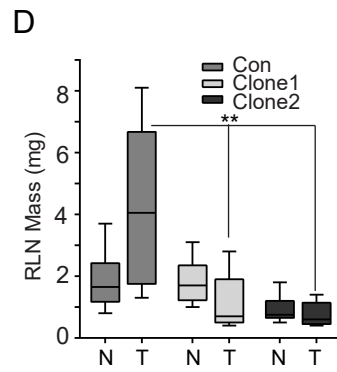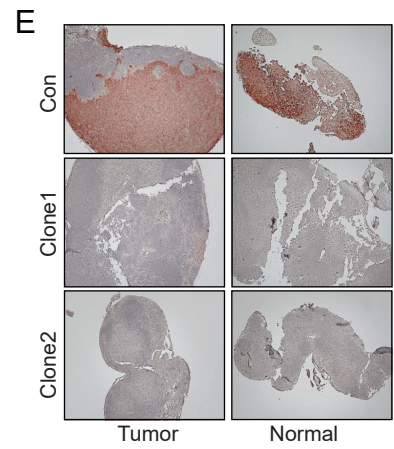

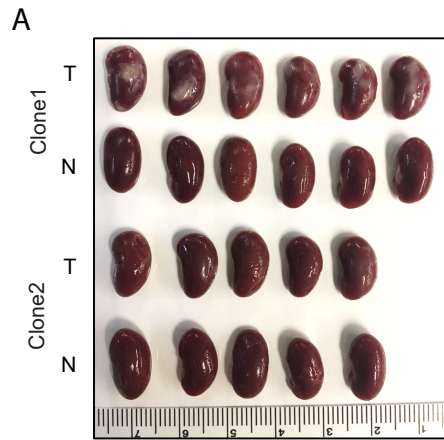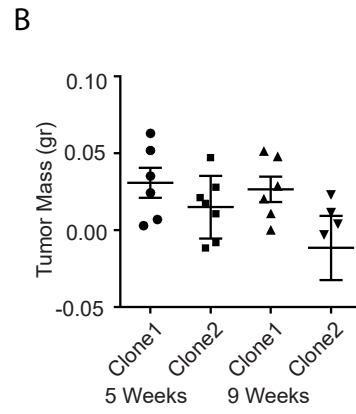

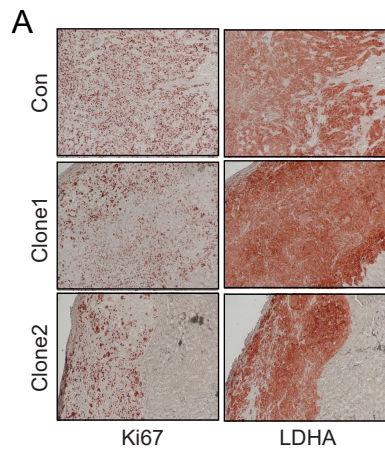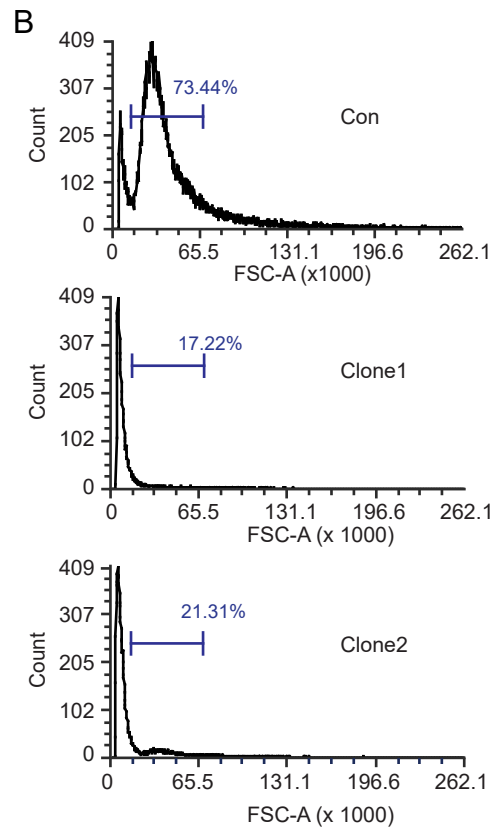

Supplement: 41598_2018_23212_MOESM1_ESM.pdf [file 41598_2018_23212_MOESM1_ESM.pdf]
