# Supplementary material for: βArrestin2 Mediates Renal Cell Carcinoma Tumor Growth
Source: PubMed Central journal article supplement (PMC5861056; doi:10.1038/s41598-018-23212-w), 2018-03-20

Supplemental Information: Raw Data

## **$\beta$ Arrestin2 Mediates Renal Cell Carcinoma Tumor Growth**

Jude Masannat<sup>‡</sup>, Hamsa Thayele Purayil, Yushan Zhang<sup>†</sup>, Michelle Russin, Iqbal Mahmud, Wanju Kim, Daiqing Liao, Yehia Daaka<sup>§</sup>

Department of Anatomy and Cell Biology, University of Florida College of Medicine, Gainesville, FL 32610

<sup>§</sup>Correspondence: Yehia Daaka, 1333 Center Drive, B1-004, Gainesville, FL, 32610. Phone: 352-273-8112; Fax: 352-846-1248; E-mail: [ydaaka@ufl.edu](mailto:ydaaka@ufl.edu)

Figure 3A

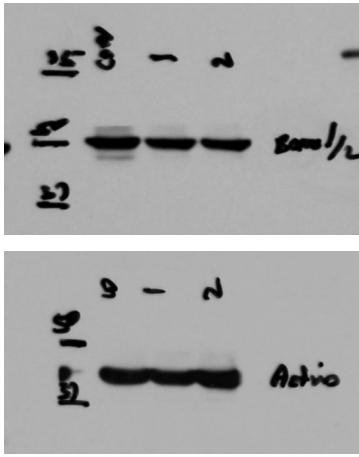

Figure 3C

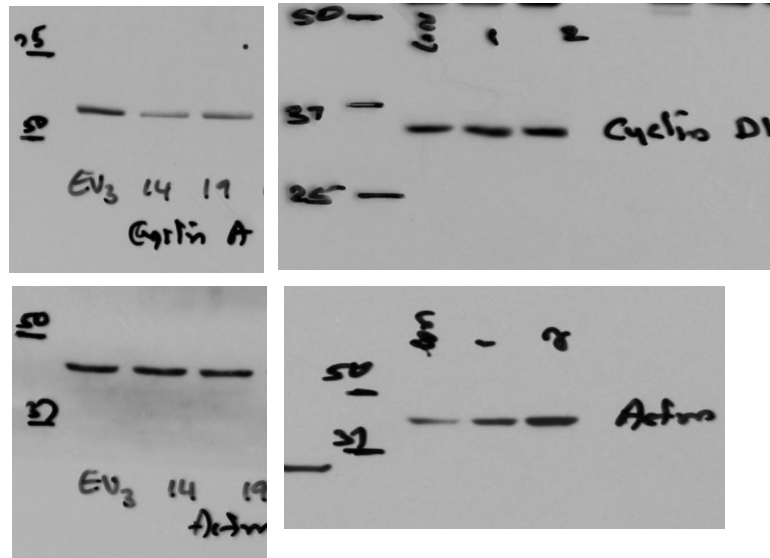

Figure 6E

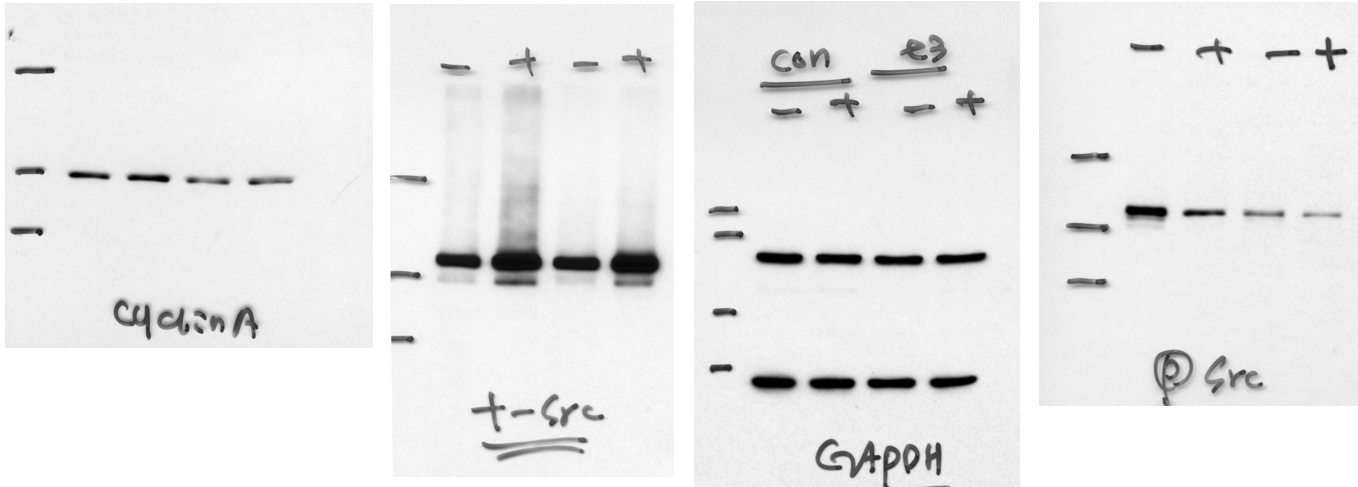

Supplement: 41598_2018_23212_MOESM2_ESM.pdf [file 41598_2018_23212_MOESM2_ESM.pdf]
